# Supplementary material for: Monitoring the action of redox-directed cancer therapeutics using a human peroxiredoxin-2-based probe
Source: PubMed Central journal article supplement (PMC6081480; doi:10.1038/s41467-018-05557-y), 2018-08-07
Supplement: 41467_2018_5557_MOESM2_ESM.pdf [file 41467_2018_5557_MOESM2_ESM.pdf]

## Description of Additional Supplementary Files

File Name: Supplementary Data 1

Description: Sequences of two plasmids encoding the Prx probe are provided in the accompanying Excel file. Tab 1: Probe\_pcDNA3.1+; Tab 2: Probe\_pLJM1
